# Supplementary material
Source: Springer Nature journal article supplement (https://www.springermedizin.de/resource/supplementary/12990_2009_245_MOESM7_ESM.pdf/9612874)

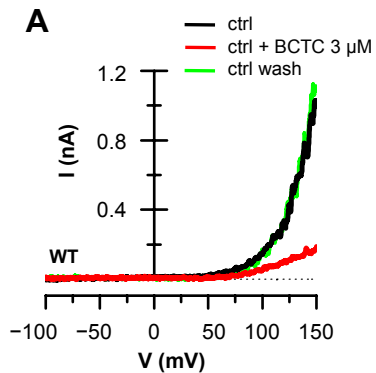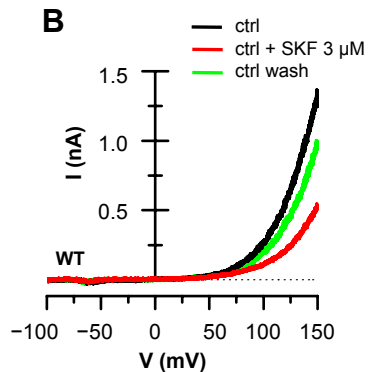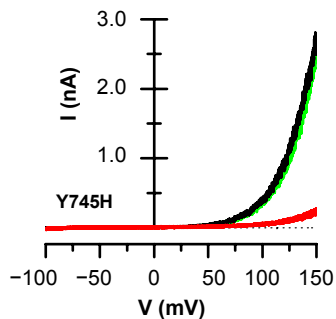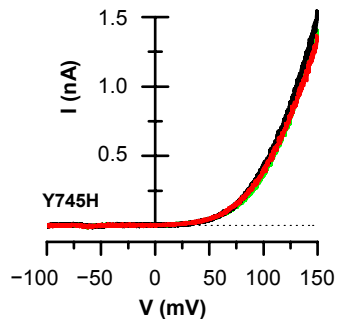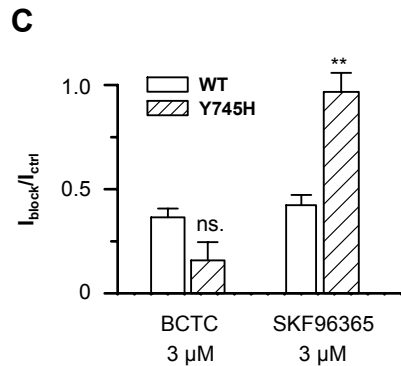

Supplement: MOESM7 [file 9612874]
